# Supplementary material for: The Effectiveness of an Educational Intervention on Knowledge, Attitudes and Reported Practices on Antibiotic Use in Humans and Pigs: A Quasi-Experimental Study in Twelve Villages in Shandong Province, China
Source: MDPI journal article supplement (doi:10.3390/ijerph18041940), 2021-02-17
Supplement: s1 [file s1]

## Supplementary Materials

**Table S1.** Introduction of interventions.

| Interventions    | Distribution                                            | Contents                                                                                                                                                                                                                                                                                                | Frequency                                                                                             |
|------------------|---------------------------------------------------------|---------------------------------------------------------------------------------------------------------------------------------------------------------------------------------------------------------------------------------------------------------------------------------------------------------|-------------------------------------------------------------------------------------------------------|
| Training session | Two chief physicians from the county hospital           | <ul style="list-style-type: none"> <li>• Introduction to antibiotics;</li> <li>• Consequences of antibiotic overuse</li> <li>• The causes of antibiotic resistance;</li> <li>• How to use antibiotics rationally;</li> <li>• How to best deal with the common cold and diarrhea in children.</li> </ul> | Every season during the one-year intervention (4 times in total)                                      |
| Speakerphone     | Playback coordinated by a social worker in each village | <ul style="list-style-type: none"> <li>• Basic knowledge of antibiotics;</li> <li>• Rational antibiotic use for children;</li> <li>• Rational antibiotic use for pigs</li> </ul>                                                                                                                        | Two times (morning and evening) every Tuesday, Thursday and Saturday during the one-year intervention |
| Posters          | Placed at key gathering points by the Research team     | <ul style="list-style-type: none"> <li>• Knowledge of upper respiratory tract infections and the immune system.</li> <li>• Rational antibiotic use for humans;</li> <li>• Potential for adverse drug reactions caused by antibiotics.</li> </ul>                                                        | Replaced with new ones once a quarter                                                                 |
| Handbook         | Delivered to households by village doctors              | <ul style="list-style-type: none"> <li>• Definition of antibiotics;</li> <li>• Antibiotic use indications;</li> <li>• Harm of irrational antibiotic use for humans;</li> <li>• How to use antibiotics rationally for humans.</li> </ul>                                                                 | Distributed after training session (4 times in total)                                                 |
